# Supplementary material for: Whole-genome sequencing illuminates the evolution and spread of multidrug-resistant tuberculosis in Southwest Nigeria
Source: PLoS One. 2017 Sep 19;12(9):e0184510. doi: 10.1371/journal.pone.0184510 (PMC5604961; doi:10.1371/journal.pone.0184510)
Supplement: S1 Table — Metadata for study isolates including study site, age, sex, treatment status (study case), HIV status, MDR & pre-XDR status, as well as lineage information inferred from kvarq, phyressse (Phy) and TBProfiler (tbp). (XLSX) [file pone.0184510.s001.xlsx]

## Sheet: Sheet1
ID	Lineage	Clade	SourceCountry	Site	Viability	Age	Sex	StudyCase	HIVResult	MDR	preXDR	XDR
NG88	Bovis	Bovis	NIGERIA	IBADAN TB LABORATORY	Yes	40	Male	New	Negative	Sensitive
NG1	4	Cameroon	NIGERIA	NIMR-LAGOS	Yes	41	Male	Retreatment	Positive	Resistance	Sensitive	Sensitive
NG12	4	Cameroon	NIGERIA	NIMR-LAGOS	Yes	36	Female	New	Negative	Resistance	Sensitive	Sensitive
NG13	4	Cameroon	NIGERIA	NIMR-LAGOS	Yes	12	Female	New	Negative	Resistance	Sensitive	Sensitive
NG14	4	Cameroon	NIGERIA	NIMR-LAGOS	Yes	30	Female	Retreatment	Negative	Resistance	Resistance	Sensitive
NG18	4	Cameroon	NIGERIA	NIMR-LAGOS	Yes	41	Male	Retreatment	Negative	Resistance	Sensitive	Sensitive
NG22	4	Cameroon	NIGERIA	NIMR-LAGOS	Yes	30	Male	Retreatment	Negative	Resistance	Sensitive	Sensitive
NG23	4	Cameroon	NIGERIA	NIMR-LAGOS	Yes	58	Male	Retreatment	Negative	Resistance	Sensitive	Sensitive
NG24	4	Cameroon	NIGERIA	NIMR-LAGOS	Yes	36	Male	Retreatment	Negative	Resistance	Sensitive	Sensitive
NG25	4	Cameroon	NIGERIA	NIMR-LAGOS	Yes	40	Male	New	Positive	Resistance	Sensitive	Sensitive
NG26	4	Cameroon	NIGERIA	NIMR-LAGOS	Yes	35	Male	Retreatment	Negative	Resistance	Resistance	Sensitive
NG3	4	Cameroon	NIGERIA	NIMR-LAGOS	Yes	30	Male	Retreatment	Negative	Resistance	Sensitive	Sensitive
NG31	4	Cameroon	NIGERIA	NIMR-LAGOS	Yes	33	Male	Retreatment	Negative	Resistance	Sensitive	Sensitive
NG32	4	Cameroon	NIGERIA	NIMR-LAGOS	Yes	26	Female	Retreatment	Negative	Resistance	Resistance	Sensitive
NG36	4	Cameroon	NIGERIA	NIMR-LAGOS	Yes				Not Done	Resistance	Sensitive	Sensitive
NG46	4	Cameroon	NIGERIA	IBADAN TB LABORATORY	Yes	35	Female	Retreatment	Negative	Resistance	Sensitive	Sensitive
NG47	4	Cameroon	NIGERIA	IBADAN TB LABORATORY	Yes	38	Female	New	Negative	Sensitive
NG50	4	Cameroon	NIGERIA	NIMR-LAGOS	Yes	46	Female	New	Positive	Sensitive
NG54	4	Cameroon	NIGERIA	NIMR-LAGOS	Yes	26	Male	Retreatment	Negative	Resistance	Resistance	Sensitive
NG6	4	Cameroon	NIGERIA	NIMR-LAGOS	Yes	28	Female	Failure	Negative	Resistance	Sensitive	Sensitive
NG61	4	Cameroon	NIGERIA	IBADAN TB LABORATORY	Yes	51	Male	Retreatment	Negative	Sensitive
NG62	4	Cameroon	NIGERIA	IBADAN TB LABORATORY	Yes	44	Male	New	Negative	Sensitive
NG64	4	Cameroon	NIGERIA	IBADAN TB LABORATORY	Yes	23	Female	Retreatment	Negative	Resistance	Resistance	Sensitive
NG65	4	Cameroon	NIGERIA	IBADAN TB LABORATORY	Yes	29	Female	Retreatment	Negative	Sensitive
NG68	4	Cameroon	NIGERIA	IBADAN TB LABORATORY	Yes	42	Male	Retreatment	Negative	Resistance	Sensitive	Sensitive
NG72	4	Cameroon	NIGERIA	NIMR-LAGOS	Yes	23	Male	Failure	Negative	Sensitive
NG75	4	Cameroon	NIGERIA	NIMR-LAGOS	Yes	38	Female	Relapse	Positive	Sensitive
NG76	4	Cameroon	NIGERIA	NIMR-LAGOS	Yes	31	Female	New	Positive	Sensitive
NG77	4	Cameroon	NIGERIA	NIMR-LAGOS	Yes	38	Female	Relapse	Positive	Sensitive
NG78	4	Cameroon	NIGERIA	NIMR-LAGOS	Yes	36	Male	Relapse	Negative	Sensitive
NG79	4	Cameroon	NIGERIA	NIMR-LAGOS	Yes	41	Male	Failure	Positive	Sensitive
NG80	4	Cameroon	NIGERIA	IBADAN TB LABORATORY	Yes	47	Male	Retreatment	Negative	Sensitive
NG81	4	Cameroon	NIGERIA	IBADAN TB LABORATORY	Yes	25	Female	New	Negative	Sensitive
NG82	4	Cameroon	NIGERIA	IBADAN TB LABORATORY	Yes	7	Male	New	Negative	Sensitive
NG83	4	Cameroon	NIGERIA	IBADAN TB LABORATORY	Yes	17	Male	Retreatment	Negative	Sensitive
NG85	4	Cameroon	NIGERIA	IBADAN TB LABORATORY	Yes	27	Male	Retreatment	Negative	Sensitive
NG86	4	Cameroon	NIGERIA	IBADAN TB LABORATORY	Yes	28	Male	Retreatment	Negative	Sensitive
NG89	4	Cameroon	NIGERIA	IBADAN TB LABORATORY	Yes	33	Male	New	Negative	Sensitive
NG9	4	Cameroon	NIGERIA	NIMR-LAGOS	Yes	58	Male	Failure	Negative	Resistance	Sensitive	Sensitive
NG90	4	Cameroon	NIGERIA	NIMR-LAGOS	Yes	36	Male	Retreatment	Negative	Sensitive
NG15	4	Uganda	NIGERIA	NIMR-LAGOS	Yes	35	Male	Retreatment	Positive	Resistance	Sensitive	Sensitive
NG51	4	Uganda	NIGERIA	NIMR-LAGOS	Yes	38	Male	New	Negative	Sensitive
NG52	4	Uganda	NIGERIA	NIMR-LAGOS	Yes	32	Female	New	Negative	Sensitive
NG53	4	Uganda	NIGERIA	NIMR-LAGOS	Yes	45	Male	Relapse	Negative	Sensitive
NG70	4	Unassigned	NIGERIA	IBADAN TB LABORATORY	Yes	47	Male	Retreatment	Negative	Resistance	Sensitive	Sensitive
NG71	4	Uganda	NIGERIA	NIMR-LAGOS	Yes	42	Female	Relapse	Negative	Sensitive
NG74	4	Uganda	NIGERIA	NIMR-LAGOS	Yes	42	Female	Relapse	Negative	Sensitive	Sensitive	Sensitive
NG10	4	Ghana	NIGERIA	NIMR-LAGOS	Yes	18	Female	Relapse	Positive	Resistance	Sensitive	Sensitive
NG30	4	Ghana	NIGERIA	NIMR-LAGOS	Yes	57	Female	Retreatment	Negative	Resistance	Sensitive	Sensitive
NG34	4	Ghana	NIGERIA	NIMR-LAGOS	Yes	57	Female	Retreatment	Negative	Resistance	Sensitive	Sensitive
NG35	4	Ghana	NIGERIA	NIMR-LAGOS	Yes	57	Female	Retreatment	Negative	Resistance	Sensitive	Sensitive
NG21	4	Ghana Haarlem X-type	NIGERIA	NIMR-LAGOS	Yes	30	Male	Retreatment	Negative	Resistance	Sensitive	Sensitive
NG17	4	H37Rv	NIGERIA	NIMR-LAGOS	Yes	50	Female	Retreatment	Negative	Resistance	Sensitive	Sensitive
NG16	4	Haarlem	NIGERIA	NIMR-LAGOS	Yes	41	Male	Relapse	Positive	Resistance	Sensitive	Sensitive
NG4	4	Haarlem	NIGERIA	NIMR-LAGOS	Yes	41	Male	Retreatment	Positive	Resistance	Sensitive	Sensitive
NG42	4	Haarlem	NIGERIA	NIMR-LAGOS	Yes	31	Male	Relapse	Negative	Resistance	Sensitive	Sensitive
NG43	4	Haarlem	NIGERIA	NIMR-LAGOS	Yes	41	Male	Retreatment	Positive	Resistance	Sensitive	Sensitive
NG67	4	Haarlem	NIGERIA	IBADAN TB LABORATORY	Yes	30	Male	Retreatment	Negative	Sensitive
NG19	4	LAM	NIGERIA	NIMR-LAGOS	Yes	32	Female	Retreatment	Not Done	Resistance	Sensitive	Sensitive
NG39	4	LAM	NIGERIA	NIMR-LAGOS	Yes	15	Female	Failure	Negative	Sensitive
NG40	4	LAM	NIGERIA	NIMR-LAGOS	Yes	15	Female	Failure	Negative	Sensitive
NG44	4	LAM	NIGERIA	IBADAN TB LABORATORY	Yes	34	Female	Retreatment	Negative	Resistance	Sensitive	Sensitive
NG84	4	LAM	NIGERIA	IBADAN TB LABORATORY	Yes	41	Male	New	Negative	Sensitive
NG2	4	TUR	NIGERIA	NIMR-LAGOS	Yes	28	Male	New	Negative	Resistance	Sensitive	Sensitive
NG29	4	TUR	NIGERIA	NIMR-LAGOS	Yes	28	Male	Retreatment	Negative	Resistance	Sensitive	Sensitive
NG55	4	TUR	NIGERIA	NIMR-LAGOS	Yes				Not Done	Resistance	Sensitive	Sensitive
NG28	5	West Africa 1	NIGERIA	NIMR-LAGOS	Yes	35	Female	Retreatment	Negative	Resistance	Sensitive	Sensitive
NG33	5	West Africa 1	NIGERIA	NIMR-LAGOS	Yes	45	Male	Retreatment	Positive	Resistance	Sensitive	Sensitive
NG37	5	West Africa 1	NIGERIA	NIMR-LAGOS	Yes	45	Male	Retreatment	Positive	Resistance	Sensitive	Sensitive
NG38	5	West Africa 1	NIGERIA	NIMR-LAGOS	Yes	23	Male	Retreatment	Negative	Resistance	Sensitive	Sensitive
NG45	5	West Africa 1	NIGERIA	IBADAN TB LABORATORY	Yes	49	Female	Retreatment	Negative	Resistance	Sensitive	Sensitive
NG5	5	West Africa 1	NIGERIA	NIMR-LAGOS	Yes	50	Female	Retreatment	Positive	Resistance	Sensitive	Sensitive
NG69	5	West Africa 1	NIGERIA	IBADAN TB LABORATORY	Yes	77	Male	New	Negative	Sensitive
Footnote: Metadata for study isolates including lineage information inferred from kvarq, phyressse (Phy) and TBProfiler (tbp).
