# Supplementary material for: Whole-genome sequencing illuminates the evolution and spread of multidrug-resistant tuberculosis in Southwest Nigeria
Source: PLoS One. 2017 Sep 19;12(9):e0184510. doi: 10.1371/journal.pone.0184510 (PMC5604961; doi:10.1371/journal.pone.0184510)
Supplement: S2 Table — Table showing phenotypic resistance profiles to first line drugs (rifampicin, isoniazid, streptomycin and ethambutol) for all isolates and to second line drugs (capreomycin, fluoroquinolone, ethionamide and amikacin) for MDR isolates. Table also lists presence of known resistance mutations as detected by the three resistance prediction tools kvarq, phyrese and tbprofiler. (XLSX) [file pone.0184510.s002.xlsx]

## Sheet: Combined_resistance_results_spa
ID	Method	Streptomycin	Isoniazid	Rifampicin	Ethambutol	Fluoroquinolone	Capreomycin	Kanamycin	Ethionamide	Pyrazinamide
NG1	Phenotypic	Sensitive	Resistant	Resistant	Resistant	Sensitive	Sensitive	Sensitive	Sensitive
	TBProfiler	NA	katG S315N, katG P241P	rpoB S450L	embA C_16T promoter, embB M306V, embB M306I	NA	NA	NA	NA	pncA L120P
	PhyResSe	NA	katG S315N	rpoB S450L	embB M306I, embB M306V	NA	NA	NA	NA	pncA L120P
	kvarq	NA	katG S315N	rpoB S450L	NA	NA	NA	NA	NA	pncA L120P
NG2	Phenotypic	Resistant	Resistant	Resistant	Sensitive	Sensitive	Sensitive	Sensitive	Sensitive
	TBProfiler	rpsL K43R	katG S315T	rpoB S450L	embB M306V	NA	NA	NA	NA	pncA P54Q
	PhyResSe	rpsL K43R	katG S315T	rpoB S450L	embB M306V	NA	NA	NA	NA	pncA P54Q
	kvarq	rpsL K43R	katG S315T	rpoB S450L	embB M306V	NA	NA	NA	NA	NA
NG3	Phenotypic	Resistant	Resistant	Resistant	Sensitive	Sensitive	Sensitive	Sensitive	Sensitive
	TBProfiler	NA	katG P241P	rpoB H445Y	embB M306I	NA	NA	NA	NA	NA
	PhyResSe	NA	NA	rpoB H445Y	embB M306I	NA	NA	NA	NA	NA
	kvarq	NA	NA	rpoB H445Y	embB M306I	NA	NA	NA	NA	NA
NG4	Phenotypic	Sensitive	Resistant	Resistant	Resistant	Sensitive	Sensitive	Sensitive	Resistant
	TBProfiler	NA	katG S315T	rpoB S450L	embB M306V	gyrB E501D	NA	NA	NA	NA
	PhyResSe	NA	katG S315T	rpoB S450L	embB M306V	NA	NA	NA	NA	NA
	kvarq	NA	katG S315T	rpoB S450L	embB M306V	NA	NA	NA	NA	NA
NG5	Phenotypic	Resistant	Resistant	Resistant	Resistant	Sensitive	Sensitive	Sensitive	Sensitive
	TBProfiler	NA	katG S315T	rpoB S450L	embA C_12T promoter, embB M306I	NA	NA	NA	NA	pncA A_7G promoter
	PhyResSe	NA	katG S315T	rpoB S450L	embA promoter, embB M306I	NA	NA	NA	NA	pncA promoter
	kvarq	NA	katG S315T	rpoB S450L	embB M306I	NA	NA	NA	NA	NA
NG6	Phenotypic	Resistant	Resistant	Resistant	Resistant	Sensitive	Sensitive	Sensitive	Sensitive
	TBProfiler	NA	katG S315T	rpoB S450L	embB M306V	gyrA A90V	NA	NA	NA	pncA T76P
	PhyResSe	NA	katG S315T	rpoB S450L	embB M306V	gyrA A90V	NA	NA	NA	pncA T76P
	kvarq	NA	katG S315T	rpoB S450L	embB M306V	gyrA A90V	NA	NA	NA	pncA T76P
NG9	Phenotypic	Resistant	Resistant	Resistant	Resistant	Sensitive	Sensitive	Sensitive	Sensitive
	TBProfiler	NA	katG P241P	rpoB S450W	embB G406A	NA	NA	NA	NA	pncA T135P
	PhyResSe	NA	NA	rpoB S450W	embB G406A	NA	NA	NA	NA	pncA T135P
	kvarq	NA	NA	rpoB S450W	NA	NA	NA	NA	NA	pncA T135P
NG10	Phenotypic	Resistant	Resistant	Resistant	Resistant	Sensitive	Sensitive	Sensitive	Resistant
	TBProfiler	NA	fabG1 C_15T promoter, inhA I194T	rpoB H445Y	embB D328Y	NA	NA	NA	fabG1 C_15T promoter, inhA I194T	NA
	PhyResSe	NA	fabG1, inhA I194T	rpoB H445Y	embB D328Y	NA	NA	NA	NA	NA
	kvarq	NA	inhA promoter mutation -15	rpoB H445Y	NA	NA	NA	NA	NA	NA
NG12	Phenotypic	Sensitive	Resistant	Resistant	Sensitive	Sensitive	Sensitive	Sensitive	Resistant
	TBProfiler	NA	katG S315T	rpoB D435V		NA	NA	NA	NA	NA
	PhyResSe	NA	katG S315T	rpoB D435V	NA	NA	NA	NA	NA	NA
	kvarq	NA	katG S315T	rpoB D435V	NA	NA	NA	NA	NA	NA
NG13	Phenotypic	Resistant	Resistant	Resistant	Sensitive	Sensitive	Sensitive	Sensitive	Resistant
	TBProfiler	NA	fabG1 C_15T promoter, katG P241P	rpoB S450L	NA	NA	NA	NA	fabG1 C_15T promoter	pncA A102V
	PhyResSe	NA	fabG1	rpoB S450L	NA	NA	NA	NA	NA	NA
	kvarq	NA	inhA promoter mutation -15	rpoB S450L	NA	NA	NA	NA	NA	pncA A102V
NG14	Phenotypic	Resistant	Resistant	Resistant	Sensitive	Resistant	Sensitive	Sensitive	Sensitive
	TBProfiler	NA	katG S315T, katG P241P	rpoB H445L	embB Q497R	gyrA D94G	NA	NA	NA	NA
	PhyResSe	NA	katG S315T	rpoB H445L	embB Q497R	gyrA D94G	NA	NA	NA	NA
	kvarq	NA	katG S315T	rpoB H445L	embB Q497R	gyrA D94G	NA	NA	NA	NA
NG15	Phenotypic	Resistant	Resistant	Resistant	Sensitive	Sensitive	Sensitive	Sensitive	Sensitive
	TBProfiler	rpsL K43R	katG S315T	rpoB S450L	embB Q497R	NA	NA	NA	NA	pncA W68R
	PhyResSe	rpsL K43R	katG S315T	rpoB S450L	embB Q497R	NA	NA	NA	NA	pncA W68R
	kvarq	rpsL K43R	katG S315T	rpoB S450L	embB Q497R	NA	NA	NA	NA	pncA W68R
NG16	Phenotypic	Resistant	Resistant	Resistant	Resistant	Sensitive	Sensitive	Sensitive	Resistant
	TBProfiler	NA	katG S315T	rpoB S450L	embB M306V	NA	NA	NA	NA	NA
	PhyResSe	NA	katG S315N	rpoB S450L	embB M306V	NA	NA	NA	NA	NA
	kvarq	NA	katG S315T	rpoB S450L	embB M306V	NA	NA	NA	NA	NA
NG17	Phenotypic	Resistant	Resistant	Resistant	Sensitive	Sensitive	Sensitive	Sensitive	Sensitive
	TBProfiler	rrs A514C	NA	rpoB S450L	embB G406A	NA	NA	NA	NA	pncA V128G
	PhyResSe	rrs	NA	rpoB S450L	embB G406A	NA	NA	NA	NA	pncA V128G
	kvarq	rrsS S172R	NA	rpoB S450L	embB G406A	NA	NA	NA	NA	pncA V128G
NG18	Phenotypic	Resistant	Resistant	Resistant	Resistant	Sensitive	Sensitive	Sensitive	Sensitive
	TBProfiler	rpsL K43R, rpsL K88T	ahpC C_52T promoter	rpoB H445D	embB M306V	NA	NA	NA	NA	NA
	PhyResSe	rpsL K43R	NA	rpoB H445D	embB M306V	NA	NA	NA	NA	NA
	kvarq	rpsL K88T	NA	rpoB H445D	embB M306V	NA	NA	NA	NA	pncA T160R
NG19	Phenotypic	Sensitive	Resistant	Resistant	Sensitive	Sensitive	Sensitive	Sensitive	Sensitive
	TBProfiler	gid K16R	ahpC G_74A promoter	rpoB A286V, rpoB S450L	embB M306V	NA	NA	NA	NA	pncA L172P, pncA D12A
	PhyResSe	NA	NA	rpoB S450L	embB M306V	NA	NA	NA	NA	pncA D12A, pncA
	kvarq	NA	NA	rpoB S450L	embB M306V	NA	NA	NA	NA	NA
NG21	Phenotypic	Sensitive	Resistant	Resistant	Sensitive	Sensitive	Sensitive	Sensitive	Resistant
	TBProfiler	NA	fabG1 C_15T promoter, inhA I21T	rpoB S450L	embB Q497K	NA	NA	NA	fabG1 C_15T promoter, inhA I21T	NA
	PhyResSe	NA	fabG1	rpoB S450L	embB Q497K	NA	NA	NA	NA	NA
	kvarq	NA	inhA promoter mutation -15	rpoB S450L	NA	NA	NA	NA	NA	NA
NG22	Phenotypic	Resistant	Resistant	Resistant	Sensitive	Sensitive	Sensitive	Sensitive	Sensitive
	TBProfiler	NA	katG P241P	rpoB H445Y	embB M306I	NA	NA	NA	NA	NA
	PhyResSe	NA	NA	rpoB H445Y	embB M306I	NA	NA	NA	NA	NA
	kvarq	NA	NA	rpoB H445Y	embB M306I	NA	NA	NA	NA	pncA G162A
NG23	Phenotypic	Sensitive	Resistant	Resistant	Sensitive	Sensitive	Sensitive	Sensitive	Sensitive
	TBProfiler	NA	katG I335V, katG P241P	rpoB S450W	embB G406A	NA	NA	NA	NA	NA
	PhyResSe	NA	NA	rpoB S450W	embB G406A	NA	NA	NA	NA	pncA T135P
	kvarq	NA	NA	rpoB S450W	embB G406A	NA	NA	NA	NA	pncA T135P
NG24	Phenotypic	Resistant	Resistant	Resistant	Resistant	Sensitive	Sensitive	Sensitive	Sensitive
	TBProfiler	rpsL K43R	ahpC G_48A promoter, katG L587P	rpoB D435Y	embB Q497R	NA	NA	NA	NA	NA
	PhyResSe	rpsL K43R	ahpC promoter	rpoB D435Y	embB Q497R	NA	NA	NA	NA	NA
	kvarq	rpsL K43R	NA	rpoB D435Y	embB Q497R	NA	NA	NA	NA	NA
NG25	Phenotypic	Resistant	Resistant	Resistant	Resistant	Sensitive	Sensitive	Sensitive	Sensitive
	TBProfiler	rpsL K43R	ahpC G_48A promoter, katG L587P	rpoB D435Y	embB Q497R	NA	NA	NA	NA	NA
	PhyResSe	rpsL K43R	ahpC promoter	rpoB D435Y	embB Q497R	NA	NA	NA	NA	NA
	kvarq	rpsL K43R	NA	rpoB D435Y	embB Q497R	NA	NA	NA	NA	NA
NG26	Phenotypic	Sensitive	Resistant	Resistant	Sensitive	Resistant	Sensitive	Sensitive	Resistant
	TBProfiler	NA	katG S315T, katG P241P	rpoB H445D	embB M306I	gyrA D94G	NA	NA	NA	pncA A161P
	PhyResSe	NA	katG S315T	rpoB H445D	embB M306I	gyrA D94G	NA	NA	NA	pncA A161P
	kvarq	NA	katG S315T	rpoB H445D	embB M306I	gyrA D94G	NA	NA	NA	pncA A161P
NG28	Phenotypic	Resistant	Resistant	Resistant	Sensitive	Sensitive	Sensitive	Sensitive	Sensitive
	TBProfiler	NA	katG S315T	rpoB S450L	embB G406S, embB G406D	NA	NA	NA	NA	pncA T142A
	PhyResSe	NA	katG S315T	rpoB S450L	embB G406S, embB G406D	NA	NA	NA	NA	pncA T142A
	kvarq	NA	katG S315T	rpoB S450L	NA	NA	NA	NA	NA	NA
NG29	Phenotypic	Resistant	Resistant	Resistant	Resistant	Sensitive	Sensitive	Sensitive	Sensitive
	TBProfiler	rpsL K43R	katG S315T	rpoB S450L	embB G406S	NA	NA	NA	NA	pncA T_11C promoter
	PhyResSe	rpsL K43R	katG S315T	rpoB S450L	embB G406S	NA	NA	NA	NA	pncA promoter
	kvarq	rpsL K43R	katG S315T	rpoB S450L	NA	NA	NA	NA	NA	NA
NG30	Phenotypic	Resistant	Resistant	Resistant	Sensitive	Sensitive	Sensitive	Sensitive	Sensitive
	TBProfiler	NA	katG S315T	rpoB A286V, rpoB L430P, rpoB D435Y	embB Q497R	NA	NA	NA	NA	pncA L27P
	PhyResSe	NA	katG S315T	rpoB L430P, rpoB D435Y	embB Q497R	NA	NA	NA	NA	pncA L27P
	kvarq	NA	katG S315T	rpoB D435Y rpoB L430P	embB Q497R	NA	NA	NA	NA	pncA L27P
NG31	Phenotypic	Sensitive	Resistant	Resistant	Sensitive	Sensitive	Sensitive	Sensitive	Sensitive
	TBProfiler	NA	katG S315N, katG P241P	rpoB S450L	embB M306V, embB M306I	NA	NA	NA	NA	pncA L120P
	PhyResSe	NA	katG S315N	rpoB S450L	embB M306I, embB M306V	NA	NA	NA	NA	pncA L120P
	kvarq	NA	katG S315N	rpoB S450L	NA	NA	NA	NA	NA	pncA L120P
NG32	Phenotypic	Resistant	Resistant	Resistant	Sensitive	Resistant	Sensitive	Sensitive	Sensitive
	TBProfiler	NA	katG S315T	rpoB D435Y	embB M306V	gyrA D94G	NA	NA	NA	pncA Q141P
	PhyResSe	NA	katG S315T	rpoB D435Y	embB M306V	gyrA D94G	NA	NA	NA	pncA Q141P
	kvarq	NA	katG S315T	rpoB D435Y	embB M306V	gyrA D94G	NA	NA	NA	pncA Q141P
NG33	Phenotypic	Resistant	Resistant	Resistant	Sensitive	Sensitive	Sensitive	Sensitive	Resistant
	TBProfiler	NA	inhA S94A, katG A106V	rpoB S450L	embB M306V	NA	NA	NA	inhA S94A	pncA V180F
	PhyResSe	NA	inhA S94A	rpoB S450L	embB M306V	NA	NA	NA	inhA S94A	pncA V180F
	kvarq	NA	NA	rpoB S450L	embB M306V	NA	NA	NA	NA	NA
NG34	Phenotypic	Resistant	Resistant	Resistant	Sensitive	Sensitive	Sensitive	Sensitive	Sensitive
	TBProfiler	NA	katG S315T	rpoB A286V, rpoB L430P, rpoB D435Y	embB Q497R	NA	NA	NA	NA	pncA L27P
	PhyResSe	NA	katG S315T	rpoB L430P, rpoB D435Y	embB Q497R	NA	NA	NA	NA	pncA L27P
	kvarq	NA	katG S315T	rpoB L430P	embB Q497R	NA	NA	NA	NA	pncA L27P
NG35	Phenotypic	Resistant	Resistant	Resistant	Sensitive	Sensitive	Sensitive	Sensitive	Sensitive
	TBProfiler	NA	katG S315T	rpoB A286V, rpoB L430P, rpoB D435Y	embB Q497R	NA	NA	NA	NA	pncA L27P
	PhyResSe	NA	katG S315T	rpoB L430P, rpoB D435Y	embB Q497R	NA	NA	NA	NA	pncA L27P
	kvarq	NA	katG S315T	rpoB L430P	embB Q497R	NA	NA	NA	NA	pncA L27P
NG36	Phenotypic	Resistant	Resistant	Resistant	Sensitive	Sensitive	Sensitive	Sensitive	Sensitive
	TBProfiler	NA	katG S315N, katG P241P	rpoB S450L	embB G406S	NA	NA	NA	NA	NA
	PhyResSe	gidB A138V	katG S315N	rpoB S450L	embB G406S	NA	NA	NA	NA	NA
	kvarq	NA	katG S315N	rpoB S450L	NA	NA	NA	NA	NA	NA
NG37	Phenotypic	Resistant	Resistant	Resistant	Sensitive	Sensitive	Sensitive	Sensitive	Resistant
	TBProfiler	NA	inhA S94A, katG A106V	rpoB S450L	embB M306V	NA	NA	NA	inhA S94A	pncA V180F
	PhyResSe	NA	inhA S94A	rpoB S450L	embB M306V	NA	NA	NA	inhA S94A	pncA V180F
	kvarq	NA	NA	rpoB S450L	embB M306V	NA	NA	NA	NA	NA
NG38	Phenotypic	Resistant	Resistant	Resistant	Resistant	Sensitive	Sensitive	Sensitive	Resistant
	TBProfiler	rpsL K43R	katG S315T	rpoB S450L, rpoC D747A	embA D4N, embB M306V	NA	NA	NA	NA	pncA G17D
	PhyResSe	rpsL K43R	katG S315T	rpoB S450L	embB M306V, embA D4N	NA	NA	NA	NA	NA
	kvarq	rpsL K43R	katG S315T	rpoB S450L	embB M306V	NA	NA	NA	NA	pncA G17D
NG39	Phenotypic	Sensitive	Sensitive	Sensitive	Sensitive	Not Done	Not Done	Not Done	Not Done
	TBProfiler	NA	katG S315T	rpoB S450L	NA	NA	NA	NA	NA	NA
	PhyResSe	NA	katG S315T	rpoB S450L	NA	NA	NA	NA	NA	NA
	kvarq	NA	katG S315T	rpoB S450L	NA	NA	NA	NA	NA	NA
NG40	Phenotypic	Sensitive	Sensitive	Sensitive	Sensitive	Not Done	Not Done	Not Done	Not Done
	TBProfiler	NA	katG S315T	rpoB S450L	NA	NA	NA	NA	NA	NA
	PhyResSe	NA	katG S315T	rpoB S450L	NA	NA	NA	NA	NA	NA
	kvarq	NA	katG S315T	rpoB S450L	NA	NA	NA	NA	NA	NA
NG42	Phenotypic	Resistant	Resistant	Resistant	Resistant	Sensitive	Sensitive	Sensitive	Sensitive
	TBProfiler	NA	katG S315T	rpoB S450L	embA C_11A promoter, embB M306V	NA	NA	NA	NA	pncA P69L
	PhyResSe	NA	katG S315T	rpoB S450L	embB M306V	NA	NA	NA	NA	pncA P69L
	kvarq	NA	katG S315T	rpoB S450L	embB M306V	NA	NA	NA	NA	pncA P69L
NG43	Phenotypic	Sensitive	Resistant	Resistant	Resistant	Sensitive	Sensitive	Sensitive	Resistant
	TBProfiler	NA	katG S315T	rpoB S450L	embB M306V	NA	NA	NA	NA	NA
	PhyResSe	NA	katG S315T	rpoB S450L	embB M306V	NA	NA	NA	NA	NA
	kvarq	NA	katG S315T	rpoB S450L	embB M306V	NA	NA	NA	NA	NA
NG44	Phenotypic	Resistant	Resistant	Resistant	Resistant	Sensitive	Sensitive	Sensitive	Sensitive
	TBProfiler	rpsL K43R	NA	rpoB S450L	NA	NA	NA	NA	NA	pncA T76P
	PhyResSe	rpsL K43R	NA	rpoB S450L	NA	NA	NA	NA	NA	pncA T76P
	kvarq	rpsL K43R	NA	rpoB S450L	NA	NA	NA	NA	NA	pncA T76P
NG45	Phenotypic	Resistant	Resistant	Resistant	Sensitive	Sensitive	Sensitive	Sensitive	Resistant
	TBProfiler	NA	inhA S94A	rpoB S450L	embA C_12T promoter	NA	NA	NA	inhA S94A	pncA V180phe
	PhyResSe	NA	inhA S94A	rpoB S450L	embA promoter	NA	NA	NA	inhA S94A	pncA V180F
	kvarq	NA	NA	rpoB S450L	NA	NA	NA	NA	NA	pncA V180F
NG46	Phenotypic	Resistant	Resistant	Resistant	Sensitive	Sensitive	Sensitive	Sensitive	Sensitive
	TBProfiler	rpsL K43R	katG S315T	rpoB S450L	NA	NA	NA	NA	NA	pncA S67P
	PhyResSe	rpsL K43R	katG S315T	rpoB S450L	NA	NA	NA	NA	NA	pncA S67P
	kvarq	rpsL K43R	katG S315T	rpoB S450L	NA	NA	NA	NA	NA	pncA S67P
NG47	Phenotypic	Sensitive	Resistant	Sensitive	Sensitive	Not Done	Not Done	Not Done	Not Done
	TBProfiler	NA	katG S315T	NA	NA	NA	NA	NA	NA	NA
	PhyResSe	NA	katG S315T	NA	NA	NA	NA	NA	NA	NA
	kvarq	NA	katG S315T	NA	NA	NA	NA	NA	NA	NA
NG50	Phenotypic	Sensitive	Sensitive	Sensitive	Sensitive	Not Done	Not Done	Not Done	Not Done
	TBProfiler	NA	NA	NA	NA	NA	NA	NA	NA	NA
	PhyResSe	NA	NA	NA	NA	NA	NA	NA	NA	NA
	kvarq	NA	NA	NA	NA	NA	NA	NA	NA	NA
NG51	Phenotypic	Sensitive	Sensitive	Sensitive	Sensitive	Not Done	Not Done	Not Done	Not Done
	TBProfiler	NA	NA	NA	NA	NA	NA	NA	NA	NA
	PhyResSe	NA	NA	NA	NA	NA	NA	NA	NA	NA
	kvarq	NA	NA	NA	NA	NA	NA	NA	NA	NA
NG52	Phenotypic	Sensitive	Sensitive	Sensitive	Sensitive	Not Done	Not Done	Not Done	Not Done
	TBProfiler	NA	NA	NA	NA	NA	NA	NA	NA	NA
	PhyResSe	NA	NA	NA	NA	NA	NA	NA	NA	NA
	kvarq	NA	NA	NA	NA	NA	NA	NA	NA	NA
NG53	Phenotypic	Sensitive	Sensitive	Sensitive	Sensitive	Not Done	Not Done	Not Done	Not Done
	TBProfiler	NA	NA	NA	NA	NA	NA	NA	NA	NA
	PhyResSe	NA	NA	NA	NA	NA	NA	NA	NA	pncA V125F
	kvarq	NA	NA	NA	NA	NA	NA	NA	NA	pncA V125F
NG54	Phenotypic	Resistant	Resistant	Resistant	Resistant	Resistant	Sensitive	Sensitive	Sensitive
	TBProfiler	NA	katG S315N, katG P241P	rpoB S450L	embB M306V, embB Q497P	gyrA D94G	NA	NA	NA	NA
	PhyResSe	NA	katG S315N	rpoB S450L	embB M306V	gyrA D94G	NA	NA	NA	NA
	kvarq	NA	katG S315N	rpoB S450L	embB M306V	NA	NA	NA	NA	NA
NG55	Phenotypic	Resistant	Resistant	Resistant	Resistant	Sensitive	Sensitive	Sensitive	Sensitive
	TBProfiler	rpsL K43R	katG S315T	rpoB S450L	embB M306V	NA	NA	NA	NA	pncA P54Q
	PhyResSe	rpsL K43R	katG S315T	rpoB S450L	embB M306V	NA	NA	NA	NA	pncA P54Q
	kvarq	rpsL K43R	katG S315T	rpoB S450L	embB M306V	NA	NA	NA	NA	NA
NG61	Phenotypic	Sensitive	Sensitive	Sensitive	Sensitive	Not Done	Not Done	Not Done	Not Done
	TBProfiler	NA	NA	NA	NA	NA	NA	NA	NA	NA
	PhyResSe	NA	NA	NA	NA	NA	NA	NA	NA	NA
	kvarq	NA	NA	NA	NA	NA	NA	NA	NA	NA
NG62	Phenotypic	Sensitive	Sensitive	Sensitive	Sensitive	Not Done	Not Done	Not Done	Not Done
	TBProfiler	NA	NA	NA	NA	NA	NA	NA	NA	NA
	PhyResSe	NA	NA	NA	NA	NA	NA	NA	NA	NA
	kvarq	NA	NA	NA	NA	NA	NA	NA	NA	NA
NG64	Phenotypic	Resistant	Resistant	Resistant	Resistant	Resistant	Sensitive	Sensitive	Sensitive
	TBProfiler	NA	katG S315T, katG P241P	rpoB S450W	embB D354A, embB Q497P	NA	NA	NA	NA	NA
	PhyResSe	NA	katG S315T	rpoB S450W	NA	gyrA D94A	NA	NA	NA	NA
	kvarq	NA	katG S315T	rpoB S450W	NA	gyrA D94A	NA	NA	NA	pncA S67L
NG65	Phenotypic	Sensitive	Resistant	Sensitive	Resistant	Not Done	Not Done	Not Done	Not Done
	TBProfiler	NA	katG P241P	NA	NA	NA	NA	NA	NA	NA
	PhyResSe	NA	NA	NA	NA	NA	NA	NA	NA	NA
	kvarq	NA	NA	NA	NA	NA	NA	NA	NA	NA
NG67	Phenotypic	Sensitive	Resistant	Sensitive	Resistant	Not Done	Not Done	Not Done	Not Done
	TBProfiler	NA	NA	NA	NA	NA	NA	NA	NA	NA
	PhyResSe	NA	NA	NA	NA	NA	NA	NA	NA	NA
	kvarq	NA	NA	NA	NA	NA	NA	NA	NA	NA
NG68	Phenotypic	Sensitive	Resistant	Resistant	Sensitive	Sensitive	Sensitive	Sensitive	Sensitive
	TBProfiler	NA	katG P241P, katG A139P	rpoB S450L	embB M306V	NA	NA	NA	NA	NA
	PhyResSe	NA	NA	rpoB S450L	embB M306V	NA	NA	NA	NA	NA
	kvarq	NA	NA	rpoB S450L	embB M306V	NA	NA	NA	NA	NA
NG69	Phenotypic	Sensitive	Sensitive	Sensitive	Sensitive	Not Done	Not Done	Not Done	Not Done
	TBProfiler	NA	NA	NA	NA	NA	NA	NA	NA	NA
	PhyResSe	NA	NA	NA	NA	NA	NA	NA	NA	NA
	kvarq	NA	NA	NA	NA	NA	NA	NA	NA	NA
NG70	Phenotypic	Sensitive	Resistant	Resistant	Sensitive	Sensitive	Sensitive	Sensitive	Sensitive
	TBProfiler	NA	NA	rpoB S450L, rpoC F452S	embA C_12T promoter, embB M306I, embB A313V	gyrA D94H	tlyA N236K	NA	NA	NA
	PhyResSe	NA	NA	rpoB S450L	embA promoter, embB M306I	gyrA D94H	NA	NA	NA	pncA A146P
	kvarq	NA	NA	rpoB S450L	embB M306I	gyrA D94H	NA	NA	NA	pncA A146P
NG71	Phenotypic	Resistant	Sensitive	Sensitive	Sensitive	Not Done	Not Done	Not Done	Not Done
	TBProfiler	NA	NA	NA	NA	NA	NA	NA	NA	NA
	PhyResSe	NA	NA	NA	NA	NA	NA	NA	NA	NA
	kvarq	NA	NA	NA	NA	NA	NA	NA	NA	NA
NG72	Phenotypic	Sensitive	Sensitive	Sensitive	Sensitive	Not Done	Not Done	Not Done	Not Done
	TBProfiler	NA	katG P241P	NA	NA	NA	NA	NA	NA	NA
	PhyResSe	NA	NA	NA	NA	NA	NA	NA	NA	NA
	kvarq	NA	NA	NA	NA	NA	NA	NA	NA	NA
NG74	Phenotypic	Resistant	Sensitive	Sensitive	Sensitive	Sensitive	Sensitive	Sensitive	Sensitive
	TBProfiler	NA	NA	NA	NA	NA	NA	NA	NA	NA
	PhyResSe	NA	NA	NA	NA	NA	NA	NA	NA	NA
	kvarq	NA	NA	NA	NA	NA	NA	NA	NA	NA
NG75	Phenotypic	Sensitive	Sensitive	Sensitive	Sensitive	Not Done	Not Done	Not Done	Not Done
	TBProfiler	NA	NA	NA	NA	NA	NA	NA	NA	NA
	PhyResSe	NA	NA	NA	NA	NA	NA	NA	NA	NA
	kvarq	NA	NA	NA	NA	NA	NA	NA	NA	NA
NG76	Phenotypic	Resistant	Sensitive	Sensitive	Sensitive	Not Done	Not Done	Not Done	Not Done
	TBProfiler	rpsL K43R	NA	NA	NA	NA	NA	NA	NA	NA
	PhyResSe	rpsL K43R	NA	NA	NA	NA	NA	NA	NA	NA
	kvarq	rpsL K43R	NA	NA	NA	NA	NA	NA	NA	NA
NG77	Phenotypic	Sensitive	Sensitive	Sensitive	Sensitive	Not Done	Not Done	Not Done	Not Done
	TBProfiler	NA	NA	NA	NA	NA	NA	NA	NA	NA
	PhyResSe	NA	NA	NA	NA	NA	NA	NA	NA	NA
	kvarq	NA	NA	NA	NA	NA	NA	NA	NA	NA
NG78	Phenotypic	Resistant	Sensitive	Sensitive	Sensitive	Not Done	Not Done	Not Done	Not Done
	TBProfiler	NA	NA	NA	NA	NA	NA	NA	NA	NA
	PhyResSe	NA	NA	NA	NA	NA	NA	NA	NA	NA
	kvarq	NA	NA	NA	NA	NA	NA	NA	NA	NA
NG79	Phenotypic	Sensitive	Sensitive	Sensitive	Sensitive	Not Done	Not Done	Not Done	Not Done
	TBProfiler	NA	katG P241P	NA	NA	NA	NA	NA	NA	NA
	PhyResSe	NA	NA	NA	NA	NA	NA	NA	NA	NA
	kvarq	NA	NA	NA	NA	NA	NA	NA	NA	NA
NG80	Phenotypic	Sensitive	Sensitive	Sensitive	Sensitive	Not Done	Not Done	Not Done	Not Done
	TBProfiler	NA	NA	NA	NA	NA	NA	NA	NA	NA
	PhyResSe	NA	NA	NA	NA	NA	NA	NA	NA	NA
	kvarq	NA	NA	NA	NA	NA	NA	NA	NA	NA
NG81	Phenotypic	Sensitive	Sensitive	Sensitive	Sensitive	Not Done	Not Done	Not Done	Not Done
	TBProfiler	NA	NA	NA	NA	NA	NA	NA	NA	NA
	PhyResSe	NA	NA	NA	NA	NA	NA	NA	NA	NA
	kvarq	NA	NA	NA	NA	NA	NA	NA	NA	NA
NG82	Phenotypic	Sensitive	Sensitive	Sensitive	Sensitive	Not Done	Not Done	Not Done	Not Done
	TBProfiler	NA	katG P241P	NA	NA	NA	NA	NA	NA	NA
	PhyResSe	NA	NA	NA	NA	NA	NA	NA	NA	NA
	kvarq	NA	NA	NA	NA	NA	NA	NA	NA	NA
NG83	Phenotypic	Sensitive	Sensitive	Sensitive	Sensitive	Not Done	Not Done	Not Done	Not Done
	TBProfiler	NA	katG P241P	NA	NA	NA	NA	NA	NA	NA
	PhyResSe	NA	NA	NA	NA	NA	NA	NA	NA	NA
	kvarq	NA	NA	NA	NA	NA	NA	NA	NA	NA
NG84	Phenotypic	Sensitive	Sensitive	Sensitive	Sensitive	Not Done	Not Done	Not Done	Not Done
	TBProfiler	NA	NA	NA	NA	NA	NA	NA	NA	NA
	PhyResSe	NA	NA	NA	NA	NA	NA	NA	NA	NA
	kvarq	NA	NA	NA	NA	NA	NA	NA	NA	NA
NG85	Phenotypic	Sensitive	Sensitive	Sensitive	Sensitive	Not Done	Not Done	Not Done	Not Done
	TBProfiler	NA	katG P241P	NA	NA	NA	NA	NA	NA	NA
	PhyResSe	NA	NA	NA	NA	NA	NA	NA	NA	NA
	kvarq	NA	NA	NA	NA	NA	NA	NA	NA	NA
NG86	Phenotypic	Sensitive	Sensitive	Sensitive	Sensitive	Not Done	Not Done	Not Done	Not Done
	TBProfiler	NA	katG P241P	NA	NA	NA	NA	NA	NA	NA
	PhyResSe	NA	NA	NA	NA	NA	NA	NA	NA	NA
	kvarq	NA	NA	NA	NA	NA	NA	NA	NA	NA
NG88	Phenotypic	Sensitive	Sensitive	Sensitive	Sensitive	Not Done	Not Done	Not Done	Not Done
	TBProfiler	NA	NA	NA	NA	NA	NA	NA	NA	NA
	PhyResSe	NA	NA	NA	NA	NA	NA	NA	NA	pncA H57D
	kvarq	NA	NA	NA	NA	NA	NA	NA	NA	pncA H57D
NG89	Phenotypic	Sensitive	Sensitive	Sensitive	Sensitive	Not Done	Not Done	Not Done	Not Done
	TBProfiler	NA	NA	NA	NA	NA	NA	NA	NA	NA
	PhyResSe	NA	NA	NA	NA	NA	NA	NA	NA	NA
	kvarq	NA	NA	NA	NA	NA	NA	NA	NA	NA
NG90	Phenotypic	Resistant	Sensitive	Sensitive	Sensitive	Not Done	Not Done	Not Done	Not Done
	TBProfiler	NA	NA	NA	NA	NA	NA	NA	NA	NA
	PhyResSe	NA	NA	NA	NA	NA	NA	NA	NA	NA
	kvarq	NA	NA	NA	NA	NA	NA	NA	NA	NA
